# Supplementary material for: A trifunctional N-doped activated carbon–ceria shell, derived from covalent porphyrin polymers for promoting Pt activity in fuel cell cathode performance
Source: Royal Society of Chemistry journal article supplement (doi:10.1039/d2cy02034c), 2023-01-01
Supplement: d2cy02034c1.pdf [file d2cy02034c1.pdf]

## Supporting Information

A trifunctional N-doped activated carbon-ceria-shell derived from covalent porphyrin polymers for promoting Pt-activity in fuel cell's cathode performance

Arindam Modak,<sup>a,c</sup> Parthiban Velayudham<sup>a</sup>, Tatyana Bendikov<sup>b</sup> Roopathy Mohan,<sup>a</sup> and Alex Schechter<sup>\*a</sup>

<sup>a</sup>Department of Chemical Sciences, Ariel University, Ariel 40700, Israel

<sup>b</sup>Chemical Research Support Unit, Weizmann Institute of Science, Rehovot 76100, Israel

<sup>c</sup>Amity Institute of Applied Sciences, Amity University, Noida, Sector 125, Uttar Pradesh, 201301, India

\*Corresponding Author

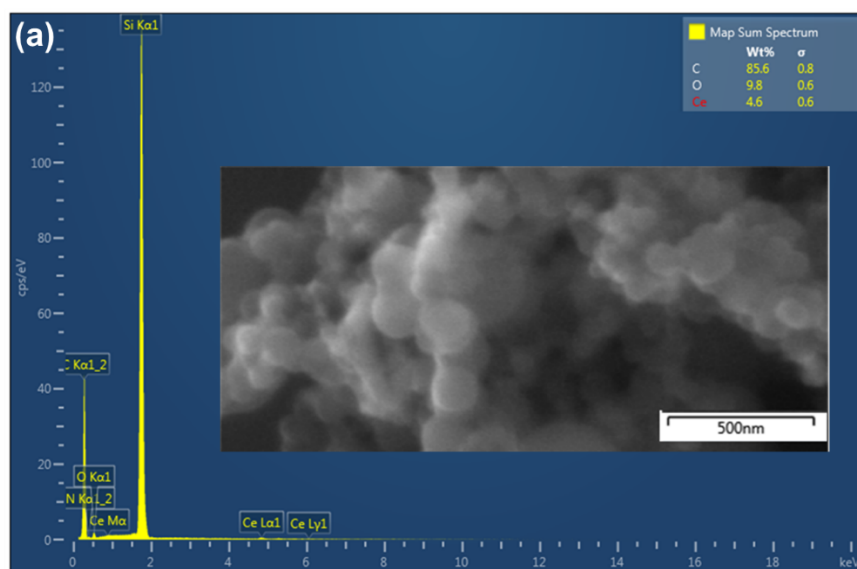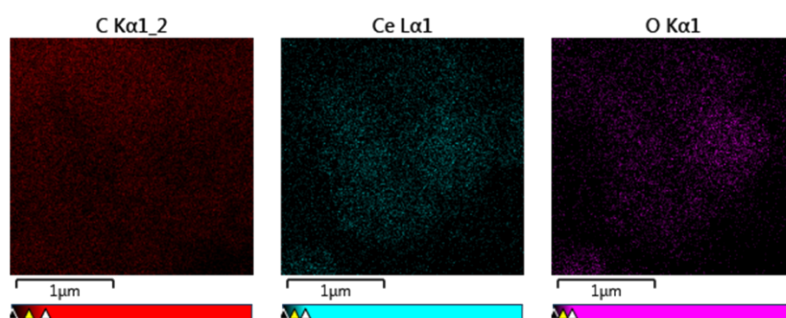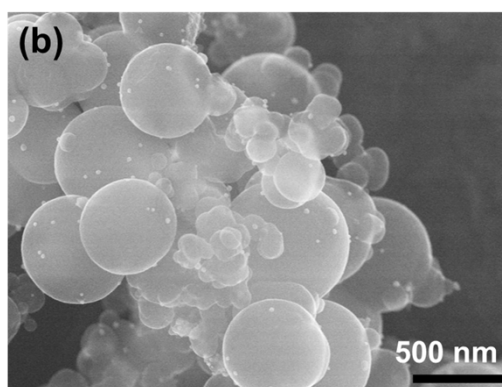

**Fig. S1.** (a) SEM-EDX and elemental mapping of C@CeO<sub>2</sub>; (b) SEM of CeO<sub>2</sub>@POP

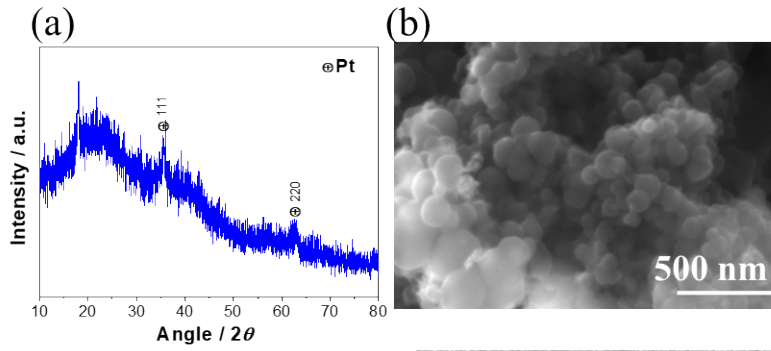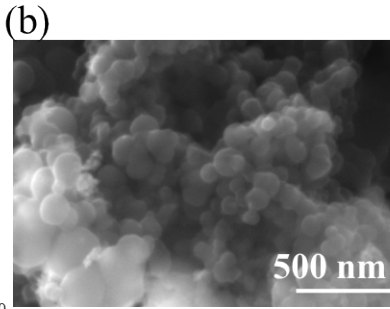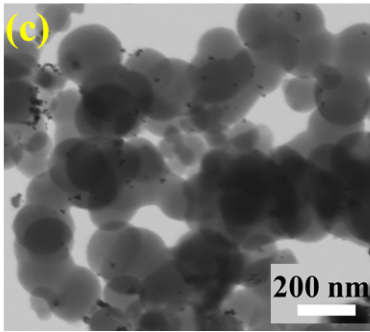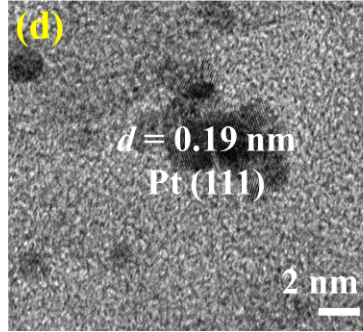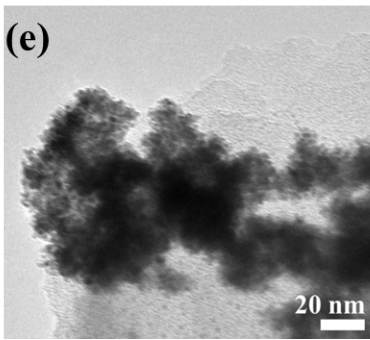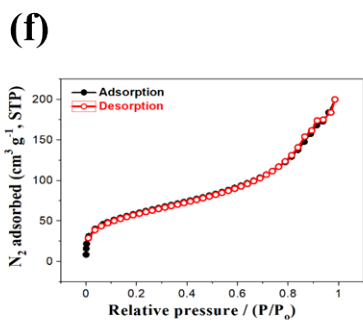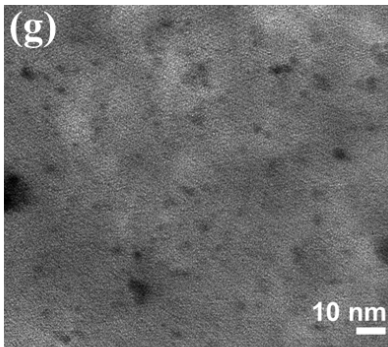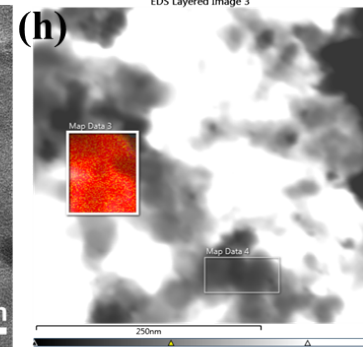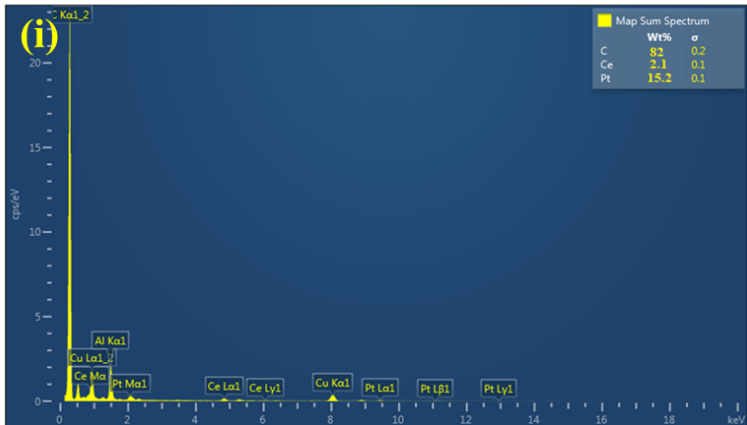

**Fig. S2.** (a) PXRD, (b) FESEM, (c) TEM and (d) HRTEM images of Pt/KC (Pt on templated activated carbon support); (e) TEM image of Pt/CeO<sub>2</sub>; (f) N<sub>2</sub> sorption isotherm of Pt/CeO<sub>2</sub>; (g) HRTEM of Pt/KC@CeO<sub>2</sub> after the accelerated durability stress test (ADST) of 5000 cycles under N<sub>2</sub> saturated 0.5 M H<sub>2</sub>SO<sub>4</sub> solution at 50 mV s<sup>-1</sup> scanning rate with 25 μg cm<sup>-2</sup> of loading; (h,i) FESEM and EDX analysis after 5000 ADST cycles of Pt/KC@CeO<sub>2</sub>

**Table S1.** Peak quantification of deconvoluted C1s, O1s, N1s, Pt4f and Ce3d of Pt-KC@CeO<sub>2</sub>

|                                      |                                     |       |
|--------------------------------------|-------------------------------------|-------|
| C1s<br>(Atomic conc.%)               | -C=C (285.6 eV)                     | 53.3  |
|                                      | -C-N (285.7 eV)                     | 2.9   |
|                                      | -CO <sub>3</sub> (290.6 eV)         | 5.58  |
|                                      | -C-O (287.7 eV)                     | 11.42 |
|                                      | -C=O (288.8 eV)                     | 2.77  |
|                                      | -O-C=O (290.7 eV)                   | 6.26  |
| O1s<br>(Atomic conc.%)               | O-M (530.9 eV)                      | 1.45  |
|                                      | C=O/C-O (532.8 eV)                  | 6.2   |
|                                      | C-O (535.8 eV)                      | 1.25  |
| N1s<br>(Atomic conc.%)               | Pyridinic N-Metal (397.8 eV)        | 1.32  |
|                                      | Pyrrolic N (400 eV)                 | 1.75  |
|                                      | Graphitic N (402.5 eV)              | 0.24  |
|                                      | Oxidized NO <sub>2</sub> (404.2 eV) | 0.1   |
|                                      | -NO <sub>3</sub> (406 eV)           | 0.09  |
| Pt4f <sup>a</sup><br>(Atomic conc.%) | Pt(0) (71.4 eV)                     | 1.07  |
|                                      | Pt(II) (72.4 eV)                    | 0.1   |
|                                      | Pt(IV) (76.9 eV)                    | 0.04  |
| Ce3d <sup>b</sup><br>(Atomic conc.%) | Ce(0) (878.5 eV)                    | 0.36  |
|                                      | Ce(II) (881.08 eV)                  | 0.5   |
|                                      | Ce(II) (882.3 eV)                   | 0.16  |
|                                      | Ce(III) (892.3 eV)                  | 0.1   |
|                                      | Ce(IV) (895.4 eV)                   | 0.15  |

<sup>a</sup>16.5 wt% based on ICP analysis

<sup>b</sup>1.9 wt% from ICP analysis

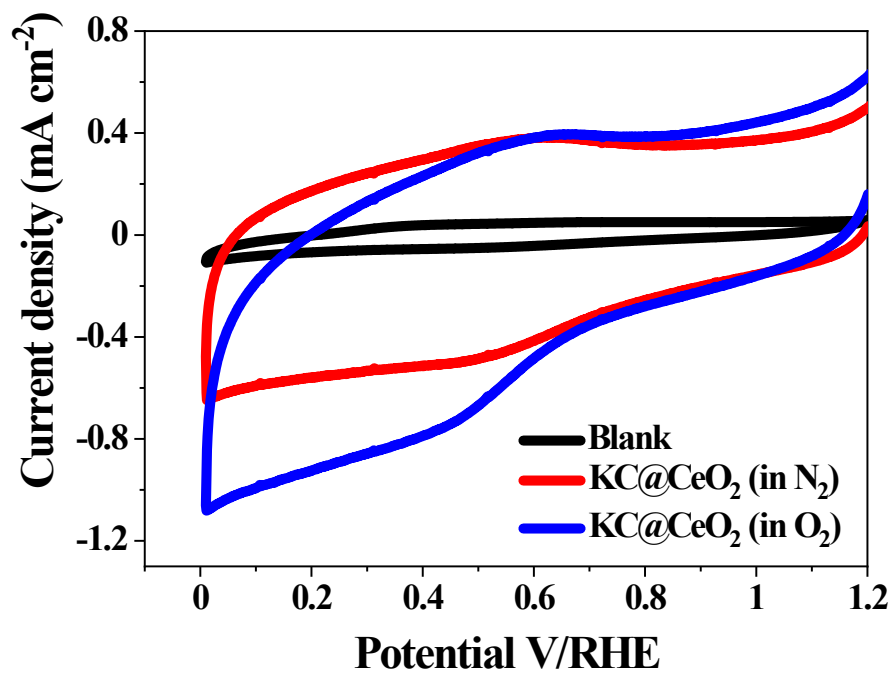

**Fig. S3.** CV of the activated carbon support, KC@CeO<sub>2</sub> (loading 100  $\mu\text{g cm}^{-2}$ ) in N<sub>2</sub> (red) and oxygen (blue) in 0.5 M H<sub>2</sub>SO<sub>4</sub> at a scan rate of 50 mV s<sup>-1</sup> at 25 °C

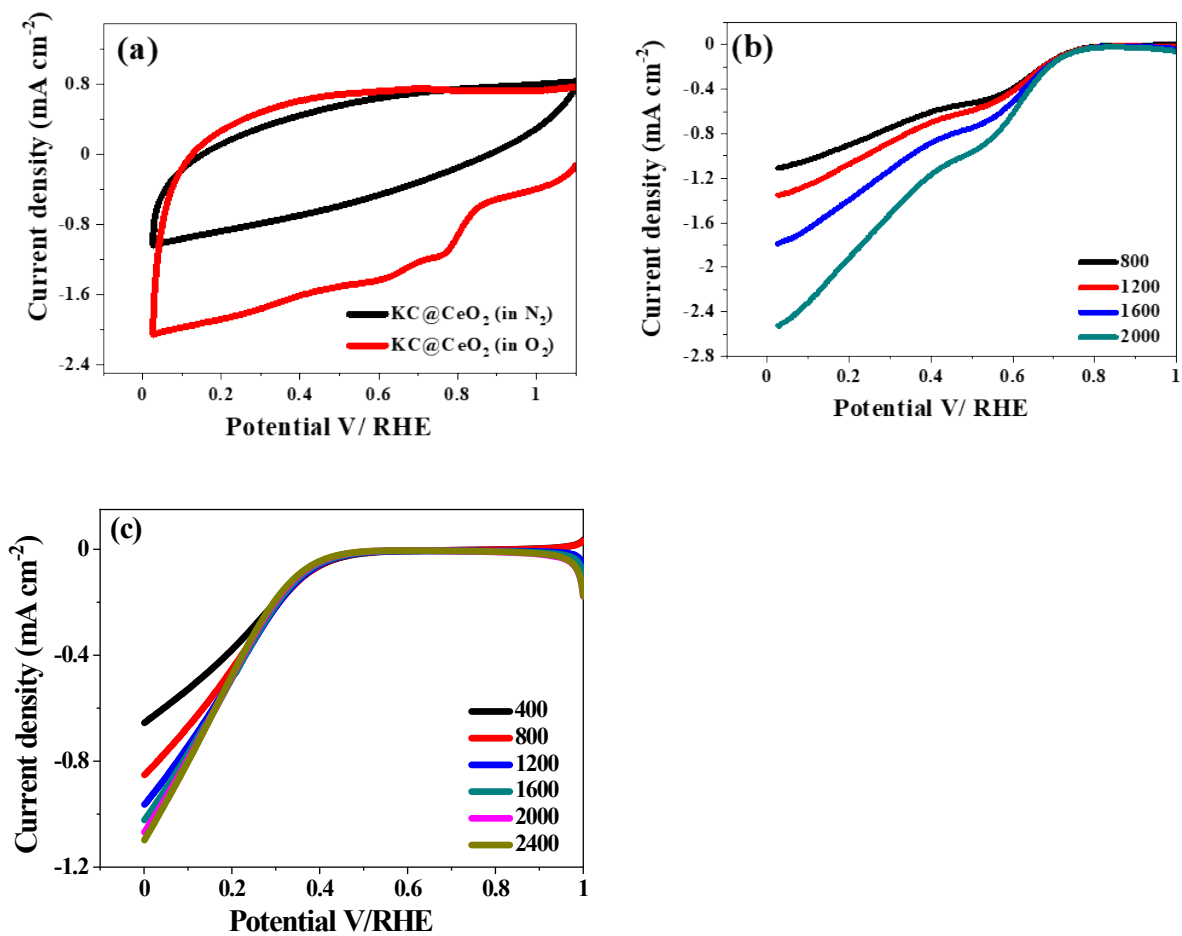

**Fig. S4.** (a) CV and (b) LSV on disk current at different RPM speeds of activated carbon support KC@CeO<sub>2</sub> (non-platinized) in 0.1 M KOH in N<sub>2</sub> (black) and O<sub>2</sub> (red); (c) LSV of the Pt-free nitrogen-doped activated carbon support, KC@CeO<sub>2</sub> at 1600 rpm at a scan rate of 5 mV sec<sup>-1</sup> in O<sub>2</sub> saturated 0.5 M H<sub>2</sub>SO<sub>4</sub> electrolyte

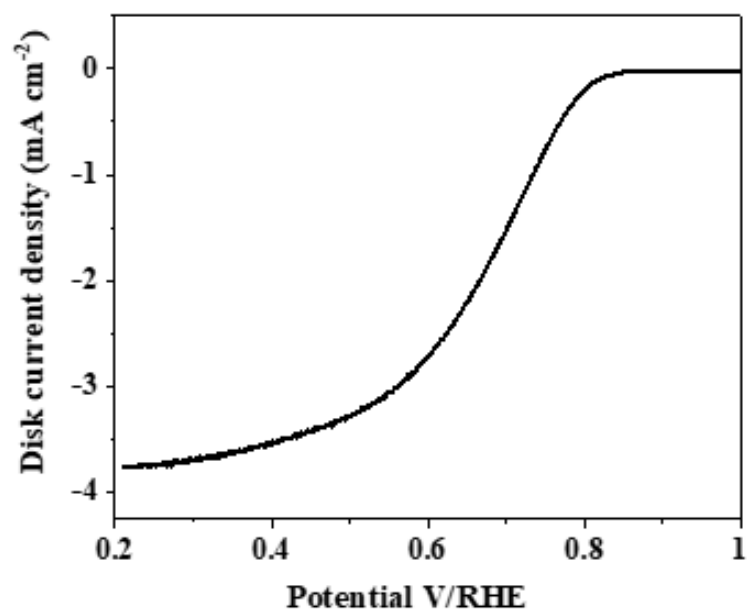

**Fig. S5.** ORR polarization curve of Pt/KC@CeO<sub>2</sub>-1 with 15.5 wt% Pt (loading of 25 μg cm<sup>-2</sup>) at 1600 rpm at a scan rate of 5 mV s<sup>-1</sup>, at 25 °C



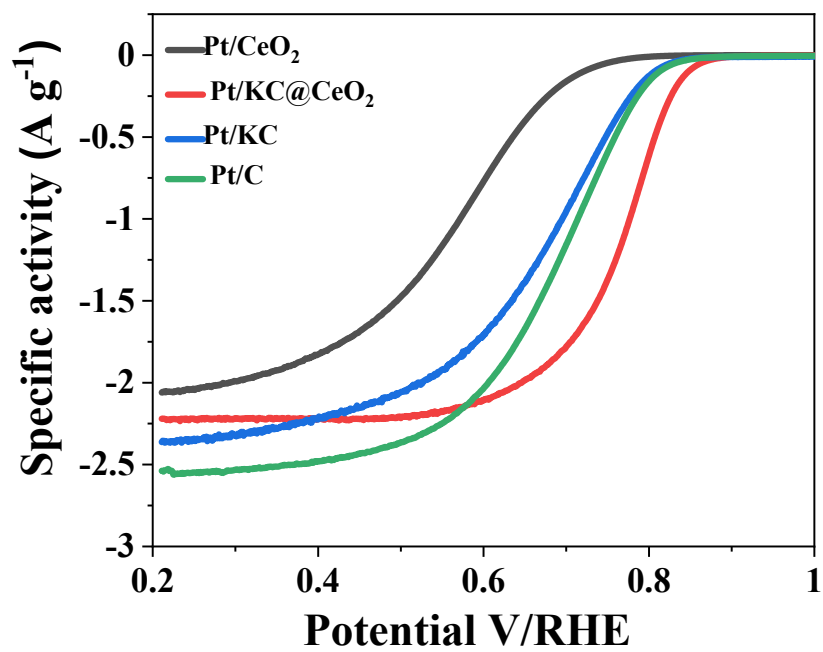

**Fig. S6.** Specific current plot of Pt-ceria composites (loading of 25  $\mu\text{g cm}^{-2}$  at 25  $^{\circ}\text{C}$ ) at 1600 rpm at a scan rate of 5  $\text{mV s}^{-1}$  in an oxygen saturated 0.5M  $\text{H}_2\text{SO}_4$  as electrolyte

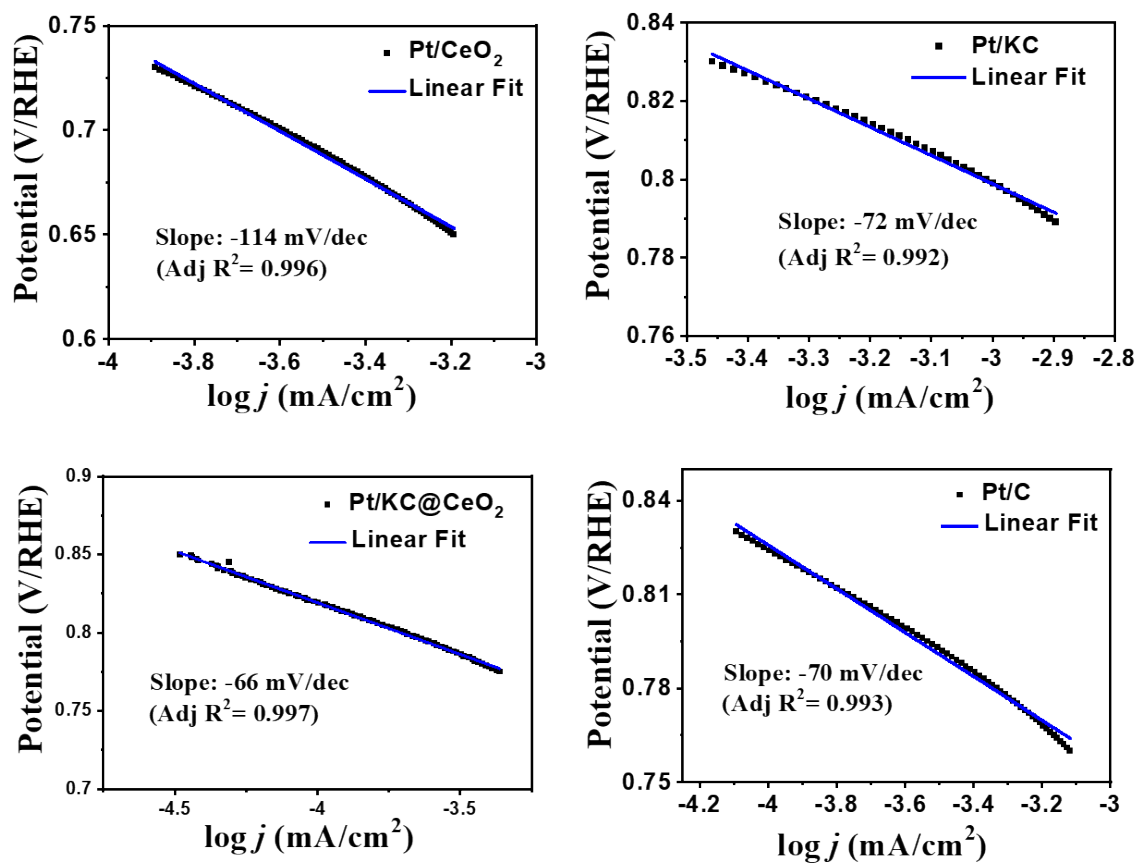

**Fig. S7.** Tafel plot of Pt-CeO<sub>2</sub>, Pt/KC, Pt/KC@CeO<sub>2</sub> and Pt/C as obtained from the kinetic current of ORR polarization curve (Figure 7a main text) for a 0.5 M oxygen saturated H<sub>2</sub>SO<sub>4</sub> solution at 1600 rpm at a scan rate of 5 mV s<sup>-1</sup>, at 25 °C

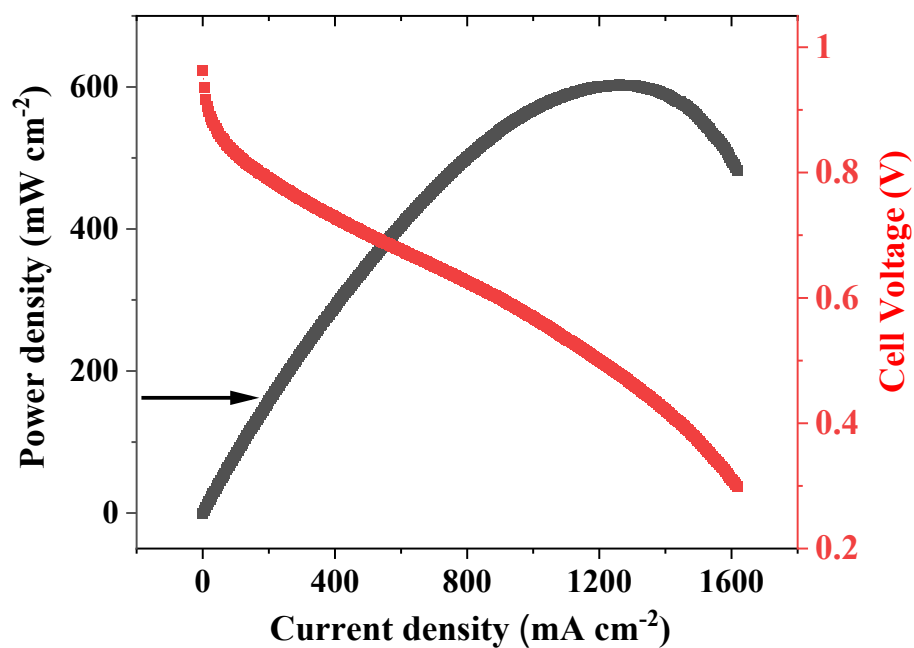

**Fig. S8.** Polarization curves of PEMFC performance of single-cell fabricated with Pt/KC@CeO<sub>2</sub>-1 under H<sub>2</sub>/O<sub>2</sub> with cathode loading of 0.5 mg cm<sup>-2</sup> and anode loading of 0.5 mg cm<sup>-2</sup> Pt/C under flow conditions of H<sub>2</sub> 0.2 L min<sup>-1</sup>, O<sub>2</sub> 0.2 L min<sup>-1</sup>; 100 RH % and 15 psi backpressure at 65 °C
